# Supplementary material for: Genomic architecture of haddock (Melanogrammus aeglefinus) shows expansions of innate immune genes and short tandem repeats
Source: PubMed Central journal article supplement (PMC5894186; doi:10.1186/s12864-018-4616-y), 2018-04-10
Supplement: 12864_2018_4616_MOESM1_ESM.pdf [file 12864_2018_4616_MOESM1_ESM.pdf]

## Supplementary to Genomic architecture of codfishes featured by expansions of innate immune genes and short tandem repeats

Ole K. Tørresen, Marine S. O. Briec, Monica H. Solbakken, Elin Sørhus, Alexander J. Nederbragt, Kjetill S. Jakobsen, Sonnich Meier, Rolf B. Edvardsen, Sissel Jentoft

### Note S1: The quality of melAeg compared to GM\_CA454PB

The melAeg assembly was created in a process very similar to GM\_CA454PB, in that raw, i.e. uncorrected, PacBio reads were assembled together with sequences of lesser error rate, Illumina and Illumina/454, respectively. For GM\_CA454PB, 454 type mate pairs were included in the assembly process itself, but since Celera Assembler does not handle Illumina type mate pair (which is contaminated with paired end reads of opposite orientation and shorter insert size), these were not included in the melAeg assembly. For both assemblies, strict criteria were set for the unitigs processed in the assemblies. During assembly, unitigs are marked as unique or repeats, and repeat unitigs are only used for scaffolding if they can be placed by paired reads properly.

To be marked as unique, these rules had to be fulfilled. The first rule that triggers marks the unitig:

For GM\_CA454PB a single PacBio read could not span more than 90 % of the unitig, the read coverage could be less than 3 in only up to 15 % of the length of the unitig, it had to contain at least 200 reads or had to be at least 10 kbp long.

For melAeg a single PacBio read could not span more than 80 % of the unitig, it had to be in the 80 % of unitigs with the most reads or the unitig had to be 15 kbp long.

These rules were set to get rid of spurious unitigs. Unitigs with one PacBio read fully covering it might pick up many reads that had only a couple of 454/Illumina reads, and therefore the

span restriction was set. If more than 15 % of the unitig was covered with less than 3 reads, this would be quite poor sequence, and of probably little usage. At least 200 bp reads would get rid of many of the same unitigs, those with low coverage or short. The 80 % of unitigs with the most reads function in much the same way, if a unitigs with less than X amount of reads are in the set of unitigs containing 20 % of the reads, it would not be marked as unique. If none of those rules trigger, the unitig had to be either 10 kbp or 15 kbp long to be marked as unique.

There are about 1,500 contigs shorter than 10 kbp in both assemblies, so the lengths are not a strict cut-off. However, this strict cut-off might have excluded some unitigs with useful sequence, such as the large multiple multi-copy gene families investigated there. The longer PacBio reads used for the melAeg assembly should have helped alleviate this issue. In conclusion, the proportion of *MHCI* genes found in melAeg and gadMor2 is as expected from previous studies (Malmstrøm et al., 2016) that is, about 50 – 75 % of expected, depending on how it is counted.

Table S1. The content of Orthogroups\_SpeciesOverlaps.csv from OrthoFinder, shows the number of orthogroups shared by each species-pair (each species contain at least one member of each group).

|                        | Cave fish    | Zebrafish    | (gadMor2)    | (gadMor1)    | Stickleback  | Spotted gar  | haddock      | Tilapia      | Medaka       | Amazon molly | Fugu         | Tetraodon    | Platyfish |
|------------------------|--------------|--------------|--------------|--------------|--------------|--------------|--------------|--------------|--------------|--------------|--------------|--------------|-----------|
| Cave fish              | <b>14275</b> | 13356        | 12019        | 12433        | 12498        | 12752        | 11037        | 12551        | 12014        | 13220        | 11974        | 11990        | 12968     |
| Zebrafish              | 13356        | <b>14351</b> | 12162        | 12577        | 12650        | 12906        | 11160        | 12693        | 12155        | 13417        | 12077        | 12050        | 13110     |
| Atlantic cod (gadMor2) | 12019        | 12162        | <b>13742</b> | 12092        | 11874        | 11681        | 11500        | 11769        | 11418        | 12431        | 11293        | 11309        | 12132     |
| Atlantic cod (gadMor1) | 12433        | 12577        | 12092        | <b>13753</b> | 13007        | 12091        | 11052        | 12296        | 11883        | 12937        | 11901        | 11852        | 12767     |
| Stickleback            | 12498        | 12650        | 11874        | 13007        | <b>13826</b> | 12139        | 10855        | 12466        | 12095        | 13141        | 12023        | 11978        | 12987     |
| Spotted gar            | 12752        | 12906        | 11681        | 12091        | 12139        | <b>13700</b> | 10762        | 12221        | 11683        | 12884        | 11652        | 11628        | 12591     |
| Atlantic haddock       | 11037        | 11160        | 11500        | 11052        | 10855        | 10762        | <b>12793</b> | 10768        | 10440        | 11372        | 10312        | 10370        | 11115     |
| Tilapia                | 12551        | 12693        | 11769        | 12296        | 12466        | 12221        | 10768        | <b>13494</b> | 12026        | 13155        | 12065        | 11972        | 12961     |
| Medaka                 | 12014        | 12155        | 11418        | 11883        | 12095        | 11683        | 10440        | 12026        | <b>13049</b> | 12630        | 11597        | 11613        | 12395     |
| Amazon molly           | 13220        | 13417        | 12431        | 12937        | 13141        | 12884        | 11372        | 13155        | 12630        | <b>14689</b> | 12384        | 12418        | 13898     |
| Fugu                   | 11974        | 12077        | 11293        | 11901        | 12023        | 11652        | 10312        | 12065        | 11597        | 12384        | <b>12726</b> | 11849        | 12279     |
| Tetraodon              | 11990        | 12050        | 11309        | 11852        | 11978        | 11628        | 10370        | 11972        | 11613        | 12418        | 11849        | <b>12905</b> | 12284     |

|           |       |       |       |       |       |       |       |       |       |       |       |       |              |
|-----------|-------|-------|-------|-------|-------|-------|-------|-------|-------|-------|-------|-------|--------------|
| Platyfish | 12968 | 13110 | 12132 | 12767 | 12987 | 12591 | 11115 | 12961 | 12395 | 13898 | 12279 | 12284 | <b>14212</b> |
|-----------|-------|-------|-------|-------|-------|-------|-------|-------|-------|-------|-------|-------|--------------|

Table S2: Number of STRs in the different assemblies

| Species      | Assembly size<br>(Mbp) | Number of STRs | loci/Mbp |
|--------------|------------------------|----------------|----------|
| Amazon molly | 749                    | 333,865        | 445.7    |
| Atlantic cod | 644                    | 760,215        | 1,180.5  |
| Haddock      | 653                    | 763,036        | 1,168.5  |
| Cavefish     | 1,191                  | 672,579        | 564.7    |
| Fugu         | 393                    | 181,766        | 462.5    |
| Medaka       | 869                    | 190,422        | 219.1    |
| Platyfish    | 730                    | 185,784        | 254.5    |
| Spotted gar  | 946                    | 114,926        | 121.5    |
| Stickleback  | 462                    | 236,110        | 511.1    |
| Tetraodon    | 359                    | 227,056        | 632.5    |
| Tilapia      | 927                    | 300,727        | 324.4    |
| Zebrafish    | 1,372                  | 1,037,400      | 756.1    |

Table S3. The number of annotated genes in the different species, and the number of STRs in them.

| Species      | Number of genes | Number of STRs in genes (di/tri) | Number of genes with STRs | Fraction of genes with STRs |
|--------------|-----------------|----------------------------------|---------------------------|-----------------------------|
| Amazon molly | 23,627          | 3,416 (134/2,115)                | 2,818                     | 0.12                        |
| Atlantic cod | 23,243          | 16,848 (5,222/7,535)             | 7,417                     | 0.32                        |
| Haddock      | 27,437          | 19,139 (8,206/6,320)             | 8,200                     | 0.30                        |
| Cavefish     | 23,043          | 5,591 (1,370/2,338)              | 4,012                     | 0.17                        |
| Fugu         | 18,525          | 4,619 (904/1,869)                | 3,228                     | 0.17                        |

|             |        |                     |       |      |
|-------------|--------|---------------------|-------|------|
| Medaka      | 19,701 | 1,766 (78/961)      | 1,566 | 0.08 |
| Platyfish   | 20,381 | 2,753 (160/1,712)   | 2,238 | 0.11 |
| Spotted gar | 18,348 | 2,872 (156/1,693)   | 2,081 | 0.11 |
| Stickleback | 20,789 | 3,468 (412/2,809)   | 2,809 | 0.14 |
| Tetraodon   | 19,610 | 2,689 (376/1,153)   | 2,223 | 0.11 |
| Tilapia     | 21,440 | 3,224 (191/1,965)   | 2,619 | 0.12 |
| Zebrafish   | 26,498 | 3,917 (1,156/1,828) | 2,740 | 0.10 |

Table S4. List of GO terms where haddock and cod differ significantly from most of other species, but not from each other. Terms in bold are where haddock and cod differ significantly from all other species.

| GO id             | GO name                                                         |
|-------------------|-----------------------------------------------------------------|
| GO:0000166        | nucleotide binding                                              |
| GO:0003676        | nucleic acid binding                                            |
| GO:0003677        | DNA binding                                                     |
| GO:0003700        | transcription factor activity, sequence-specific<br>DNA binding |
| GO:0003723        | RNA binding                                                     |
| <b>GO:0003824</b> | <b>catalytic activity</b>                                       |
| GO:0004386        | helicase activity                                               |
| <b>GO:0004672</b> | <b>protein kinase activity</b>                                  |
| <b>GO:0004674</b> | <b>protein serine/threonine kinase activity</b>                 |
| GO:0004872        | receptor activity                                               |
| <b>GO:0004930</b> | <b>G-protein coupled receptor activity</b>                      |
| GO:0005089        | Rho guanyl-nucleotide exchange factor<br>activity               |
| GO:0005216        | ion channel activity                                            |
| <b>GO:0005488</b> | <b>binding</b>                                                  |
| <b>GO:0005509</b> | <b>calcium ion binding</b>                                      |

|                   |                                                                        |
|-------------------|------------------------------------------------------------------------|
| GO:0005515        | protein binding                                                        |
| GO:0005524        | ATP binding                                                            |
| <b>GO:0005525</b> | <b>GTP binding</b>                                                     |
| <b>GO:0005622</b> | <b>intracellular</b>                                                   |
| GO:0005634        | nucleus                                                                |
| GO:0006355        | regulation of transcription, DNA-templated                             |
| <b>GO:0006468</b> | <b>protein phosphorylation</b>                                         |
| <b>GO:0006810</b> | <b>transport</b>                                                       |
| GO:0006811        | ion transport                                                          |
| GO:0006813        | potassium ion transport                                                |
| <b>GO:0007165</b> | <b>signal transduction</b>                                             |
| <b>GO:0007186</b> | <b>G-protein coupled receptor signaling pathway</b>                    |
| GO:0007264        | small GTPase mediated signal transduction                              |
| <b>GO:0008152</b> | <b>metabolic process</b>                                               |
| GO:0008270        | zinc ion binding                                                       |
| GO:0016020        | membrane                                                               |
| <b>GO:0016021</b> | <b>integral component of membrane</b>                                  |
| GO:0016311        | dephosphorylation                                                      |
| <b>GO:0016772</b> | <b>transferase activity, transferring phosphorus-containing groups</b> |
| GO:0016791        | phosphatase activity                                                   |
| GO:0035023        | regulation of Rho protein signal transduction                          |
| <b>GO:0035556</b> | <b>intracellular signal transduction</b>                               |
| GO:0043565        | sequence-specific DNA binding                                          |
| GO:0046872        | metal ion binding                                                      |
| <b>GO:0055085</b> | <b>transmembrane transport</b>                                         |

Table S5. Number of NACHT and FISNA domains in linkage groups in cod

| Linkage group | # NACHT | # FISNA |
|---------------|---------|---------|
| LG01          | 11      | 3       |
| LG02          | 3       | 1       |
| LG03          | 1       | 1       |
| LG04          | 17      | 18      |
| LG06          | 2       | 1       |
| LG07          | 7       | 11      |
| LG08          | 4       | 5       |
| LG09          | 2       | 3       |
| LG10          | 1       | 1       |
| LG11          | 2       | 3       |
| LG12          | 8       | 6       |
| LG13          | 1       | 2       |
| LG15          | 11      | 12      |
| LG16          | 1       | 1       |
| LG17          | 4       | 3       |
| LG18          | 4       | 5       |
| LG19          | 4       | 4       |
| LG20          | 1       | 1       |
| LG21          | 1       | 1       |
| LG23          | 8       | 8       |
| Total         | 93      | 90      |

Table S6. Number of NACHT and FISNA domains in chromosomes in zebrafish

| Chromosome | # NACHT | # FISNA |
|------------|---------|---------|
| 1          | 31      | 31      |
| 2          | 7       | 3       |
| 3          | 10      | 7       |

|       |     |     |
|-------|-----|-----|
| 4     | 266 | 261 |
| 5     | 1   | 1   |
| 6     | 1   | 1   |
| 7     | 2   | 0   |
| 8     | 5   | 4   |
| 11    | 2   | 1   |
| 13    | 1   | 2   |
| 15    | 19  | 18  |
| 16    | 2   | 1   |
| 17    | 10  | 10  |
| 18    | 1   | 0   |
| 19    | 3   | 3   |
| 21    | 1   | 1   |
| 22    | 14  | 14  |
| 23    | 3   | 3   |
| 24    | 1   | 0   |
| Total | 380 | 361 |

Table S7. Number of NACHT and FISNA domains in linkage groups in stickleback

| Linkage group | # NACHT | # FISNA |
|---------------|---------|---------|
| groupI        | 2       | 3       |
| groupII       | 2       | 1       |
| groupIV       | 3       | 3       |
| groupV        | 2       | 1       |
| groupVI       | 5       | 5       |
| groupVII      | 2       | 1       |
| groupVIII     | 1       | 0       |



|            |    |    |
|------------|----|----|
| groupIX    | 2  | 2  |
| groupXI    | 1  | 1  |
| groupXII   | 5  | 3  |
| groupXIII  | 12 | 12 |
| groupXIV   | 5  | 3  |
| groupXV    | 1  | 1  |
| groupXVIII | 3  | 3  |
| groupXIX   | 2  | 2  |
| groupXX    | 1  | 0  |
| groupXXI   | 3  | 5  |
| Total      | 52 | 46 |

Table S8. Number of NACHT and FISNA domains in linkage groups in spotted gar

| Linkage group | # NACHT | # FISNA |
|---------------|---------|---------|
| LG1           | 1       | 0       |
| LG2           | 1       | 0       |
| LG3           | 1       | 1       |
| LG4           | 3       | 1       |
| LG5           | 1       | 0       |
| LG8           | 1       | 0       |
| LG11          | 1       | 0       |
| LG13          | 2       | 0       |
| LG16          | 1       | 0       |
| LG17          | 1       | 0       |
| LG19          | 1       | 0       |
| LG22          | 1       | 0       |
| LG23          | 1       | 0       |
| LG24          | 1       | 0       |

|       |    |   |
|-------|----|---|
| LG28  | 2  | 0 |
| Total | 19 | 2 |

Table S9. Number of NACHT and FISNA domains in linkage groups in medaka

| Linkage group | # NACHT | # FISNA |
|---------------|---------|---------|
| 1             | 2       | 1       |
| 2             | 13      | 33      |
| 3             | 1       | 0       |
| 4             | 1       | 0       |
| 7             | 1       | 0       |
| 8             | 1       | 1       |
| 9             | 1       | 1       |
| 10            | 1       | 1       |
| 13            | 2       | 2       |
| 14            | 1       | 0       |
| 16            | 1       | 1       |
| 18            | 10      | 9       |
| 19            | 2       | 1       |
| 20            | 1       | 1       |
| 22            | 1       | 1       |
| 24            | 0       | 1       |
| Total         | 39      | 53      |

Table S10. Number of NACHT and FISNA domains in linkage groups in tetraodon

| Linkage group | # NACHT | # FISNA |
|---------------|---------|---------|
| 2             | 3       | 4       |
| 3             | 1       | 1       |

|       |    |    |
|-------|----|----|
| 4     | 1  | 0  |
| 5     | 1  | 1  |
| 7     | 1  | 1  |
| 15    | 1  | 1  |
| 17    | 1  | 1  |
| 18    | 1  | 1  |
| Total | 10 | 10 |
