# Supplementary material for: Genomic architecture of haddock (Melanogrammus aeglefinus) shows expansions of innate immune genes and short tandem repeats
Source: PubMed Central journal article supplement (PMC5894186; doi:10.1186/s12864-018-4616-y), 2018-04-10

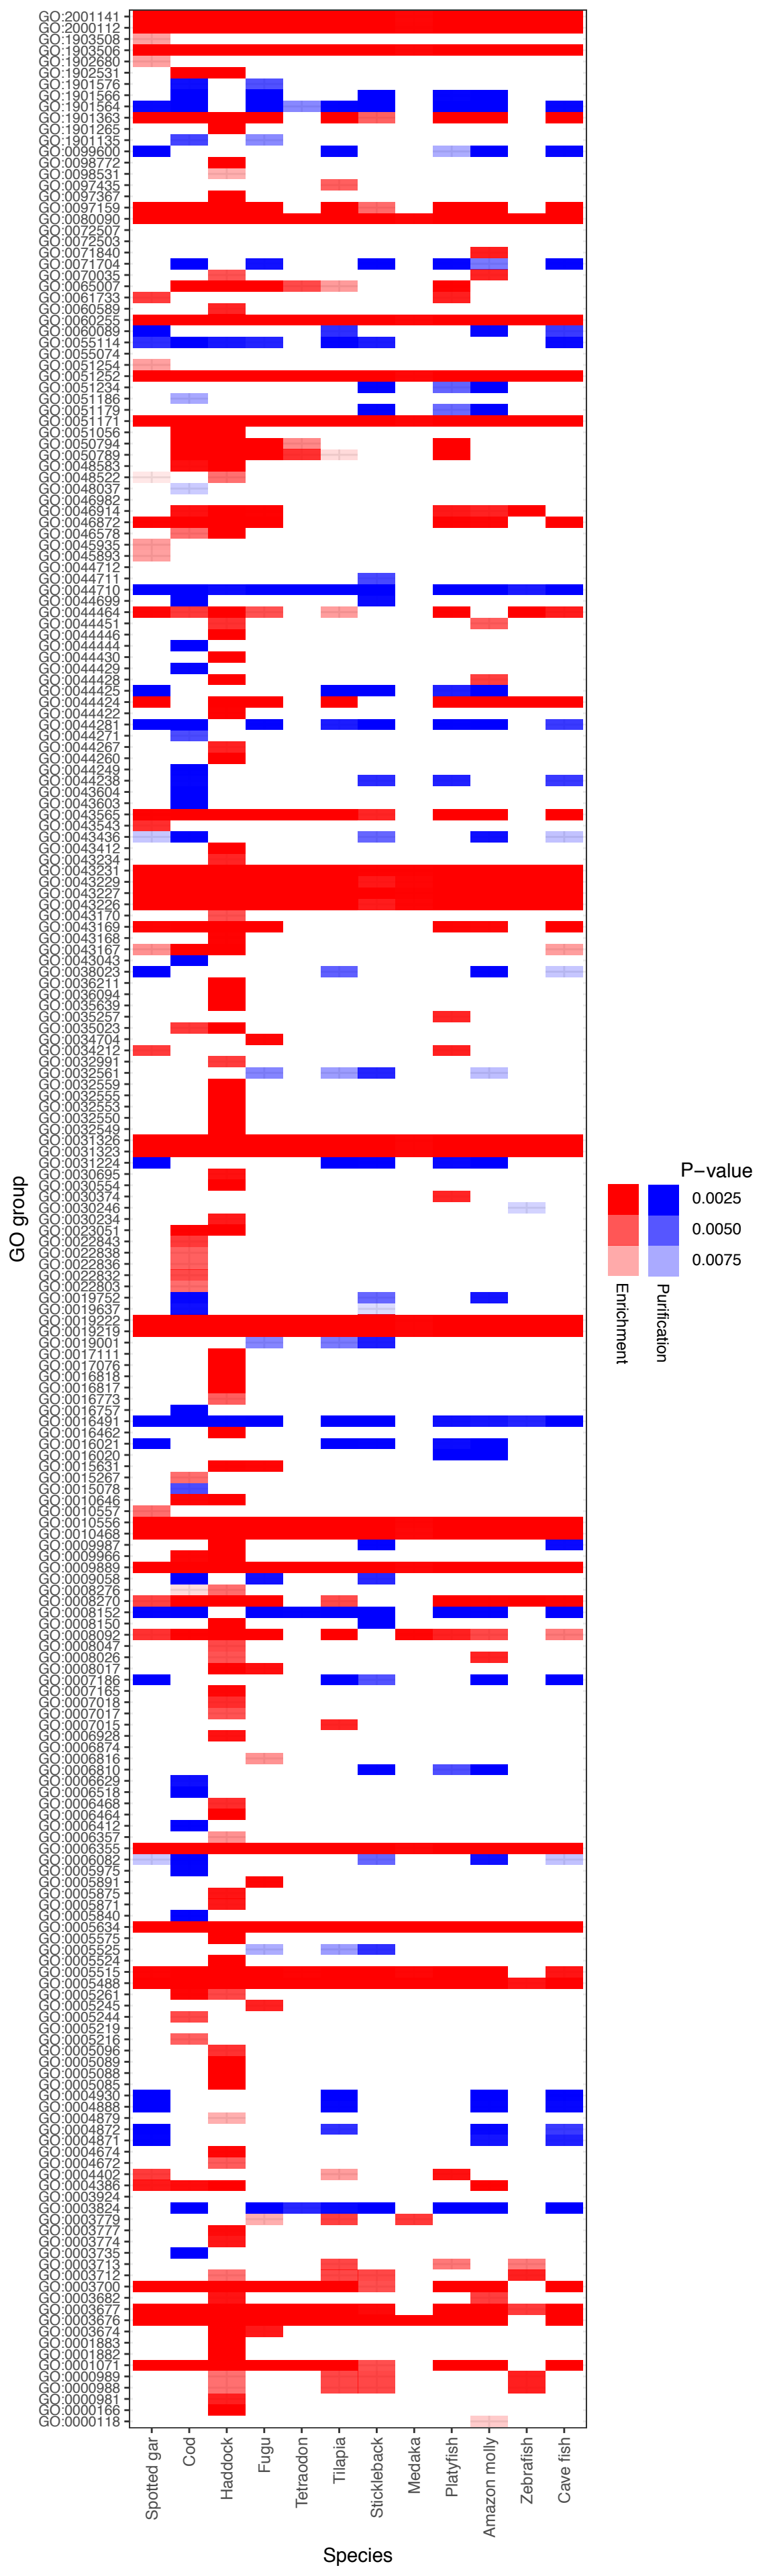

Supplement: 12864_2018_4616_MOESM3_ESM.pdf [file 12864_2018_4616_MOESM3_ESM.pdf]
